# Supplementary material for: Interlayer bond polarizability model for interlayer phonons in van der Waals heterostructures
Source: Royal Society of Chemistry journal article supplement (doi:10.1039/d3nr06437a), 2024-01-01
Supplement: d3nr06437a1.pdf [file d3nr06437a1.pdf]

# Electronic Supplementary Information

## Interlayer bond polarizability model for interlayer phonons in van der Waals heterostructures

Rui Mei<sup>1,2</sup>, Miao-Ling Lin<sup>1</sup>, Heng Wu<sup>1,2</sup>, Lin-Shang Chen<sup>1</sup>, Yan-Meng Shi<sup>1</sup>, Zhong-Ming Wei<sup>1</sup> and Ping-Heng Tan<sup>1,2\*</sup>

<sup>1</sup>State Key Laboratory of Superlattices and Microstructures, Institute of Semiconductors, Chinese Academy of Sciences, Beijing 100083, China

<sup>2</sup>Center of Materials Science and Optoelectronics Engineering & CAS Center of Excellence in Topological Quantum Computation, University of Chinese Academy of Sciences, Beijing 100049, China.

\*Corresponding authors

E-mail: [phtan@semi.ac.cn](mailto:phtan@semi.ac.cn)

### Section I. Optical images of samples

The corresponding vdWHs were meticulously assembled layer by layer in specific orders, by employing a nanomanipulator. During sample preparation, a nail polish-coated polydimethylsiloxane (PDMS) block mounted on a glass slide was utilized to pick up and release 2DM<sup>1,2</sup>. Fig. S1 shows the optical images of the prepared samples, which exhibit high quality.

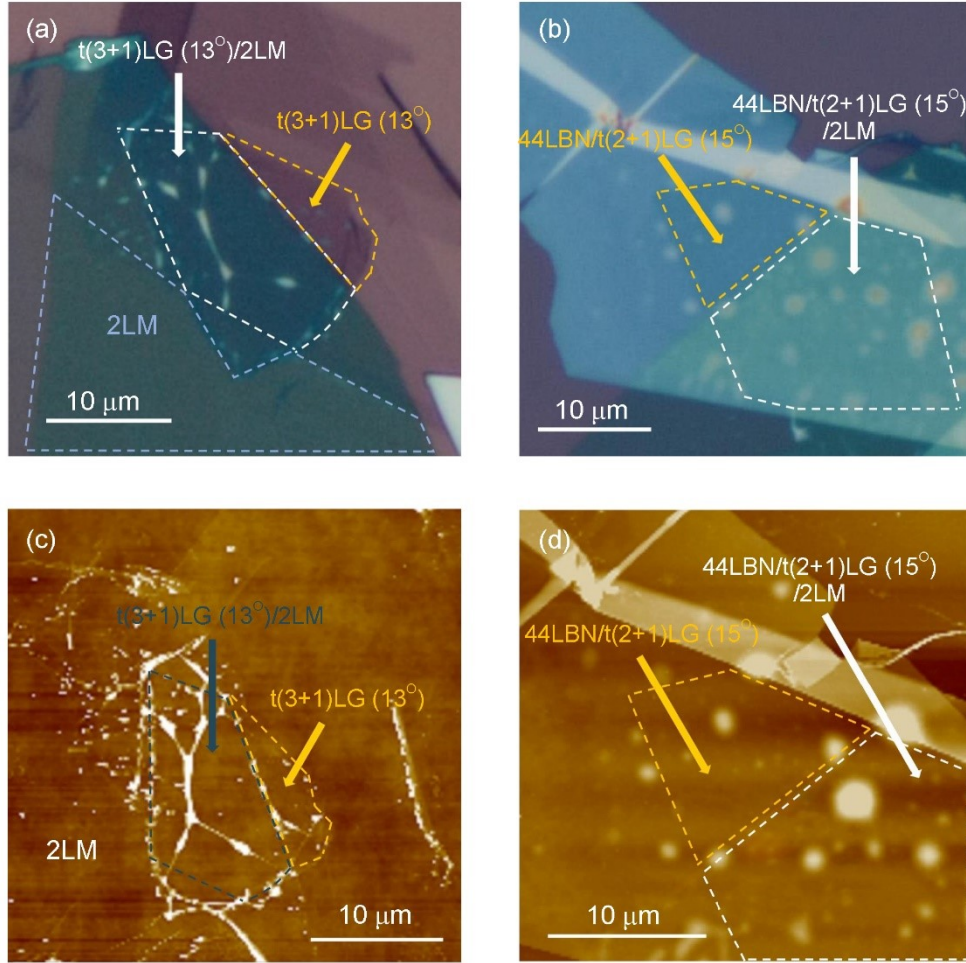

**Fig. S1.** Optical images and AFM images of samples. (a) Image of the sample which contains three regions of 2LM,  $t(3+1)LG\ 13^\circ$  and  $t(3+1)LG\ 13^\circ/2LM$ . (b) Optical image of the sample that includes  $44L-hBN/t(2+1)LG\ 15^\circ$  and  $44L-hBN/t(2+1)LG\ 15^\circ/2LM$ . (c) AFM image of the sample containing 2LM,  $t(3+1)LG\ 13^\circ$  and  $t(3+1)LG\ 13^\circ/2LM$  regions. (d) AFM image of the sample depicted in (b).

## Section II. Calculated frequencies of LBMs in vdWHs

For the LBMs in 2DMs or binary vdWHs, each layer vibrates rigidly and thus it can be simplified as a single rigid body with layer-breathing force constant interaction. Based on this feature, linear chain model (LCM) has been developed to predict the frequencies of LBMs in 2DMs and vdWHs, where only the nearest-neighbor interaction between adjacent rigid layers is considered<sup>3,4</sup>. However, the improved linear chain model

(2LCM) considering the interaction between second nearest-neighbor graphene layers is necessary to predict the LBMs in multilayer graphene (MLG), t(m+n)LG and its related vdWHs<sup>5,6</sup>.

According to the 2LCM, the frequencies of the LBMs in tMLG-based vdWHs can be calculated by solving an  $N \times N$  linear homogeneous equation<sup>3-6</sup>:

$$\omega_j^2 M u_j = \frac{1}{4\pi^2 c^2} D u_j \quad (1)$$

where  $u_j$  is the interlayer displacements of  $LB_{N,N-j}$  mode with frequency of  $\omega_j$ ,  $M$  is the diagonal mass matrix of the vdWH,  $c = 3 \times 10^{10}$  cm/s and  $D$  is the LB force constant matrix. In our calculation, the LB force constant of  $MoS_2$  is  $\alpha^\perp(M) = 8.65 \times 10^{19} N \cdot m^{-3}$ . The LB force constant of graphene is  $\alpha^\perp(Gr) = 10.7 \times 10^{19} N \cdot m^{-3}$ . The LB force constant between graphene and  $MoS_2$  is  $\alpha^\perp(Gr/M) = 5.68 \times 10^{19} N \cdot m^{-3}$ . The LB force constant between graphene and hBN is  $\alpha^\perp(Gr/hBN) = 7.83 \times 10^{19} N \cdot m^{-3}$ . In addition, because the interaction between second-nearest-neighbor graphene layers is important, the second-nearest-neighbor LB force constant in tMLG constituent ( $\beta^\perp(Gr) = 0.96 \times 10^{19} N \cdot m^{-3}$ ) should be considered. The calculated LBM frequencies of t(3+1)LG, t(2+1)LG, 44L-hBN/t(2+1)LG, t(3+1)LG/2LM, t(2+1)LG/2LM and 44L-hBN/t(2+1)LG/2LM vdWHs are presented in Fig. S2. It is clear that the theoretical frequencies are in good agreement with the experimental ones.

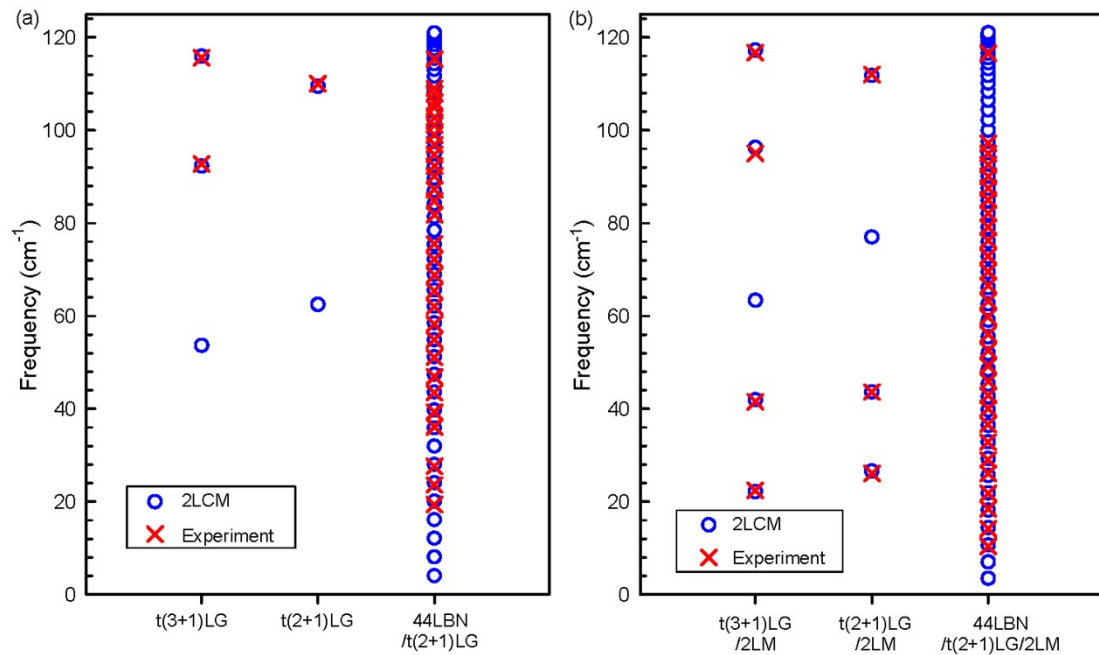

**Fig. S2.** (a) Theoretical (blue circles) and experimental (red crosses) LBM frequencies of  $t(3+1)LG$ ,  $t(2+1)LG$  and  $44L-hBN/t(2+1)LG$ . (b) Theoretical (blue circles) and experimental LBM frequencies (red crosses) of  $t(3+1)LG/2LM$ ,  $t(2+1)LG/2LM$  and  $44L-hBN/t(2+1)LG/2LM$ . The calculated results based on 2LCM are in good agreement with the experimental ones.

## References

- 1 F. Pizzocchero, L. Gammelgaard, B. S. Jessen, J. M. Caridad, L. Wang, J. Hone, P. Bøggild and T. J. Booth, *Nat. Commun.*, 2016, **7**, 11894.
- 2 K. L. Haley, J. A. Cloninger, K. Cerminara, R. M. Sterbentz, T. Taniguchi, K. Watanabe and J. O. Island, *Nanomanufacturing*, 2021, **1**, 49–56.
- 3 X. Zhang, W. P. Han, J. B. Wu, S. Milana, Y. Lu, Q. Q. Li, A. C. Ferrari and P. H. Tan, *Phys. Rev. B*, 2013, **87**, 115413.
- 4 M.-L. Lin, Y. Zhou, J.-B. Wu, X. Cong, X.-L. Liu, J. Zhang, H. Li, W. Yao and P.-H. Tan, *Nat. Commun.*, 2019, **10**, 2419.

- 5 J.-B. Wu, Z.-X. Hu, X. Zhang, W.-P. Han, Y. Lu, W. Shi, X.-F. Qiao, M. Ijiäs, S. Milana, W. Ji, A. C. Ferrari and P.-H. Tan, *ACS Nano*, 2015, **9**, 7440–7449.
- 6 H. Wu, M.-L. Lin, Y.-C. Leng, X. Chen, Y. Zhou, J. Zhang and P.-H. Tan, *npj 2D Mater. Appl.*, 2022, **6**, 87.
